# Supplementary material for: Phylogenetic Resolution and Quantifying the Phylogenetic Diversity and Dispersion of Communities
Source: PLoS One. 2009 Feb 5;4(2):e4390. doi: 10.1371/journal.pone.0004390 (PMC2633039; doi:10.1371/journal.pone.0004390)
Supplement: Table S5 — (0.07 MB DOC) [file pone.0004390.s005.doc]

**Table S5.** A table representing the power to predict MPD, MNND or FI of an assemblage with the minimal possible phylogenetic diversity estimated using the Greedy Algorithm. The slopes and r2 values from regressing the MPD, MNND or FI values derived using a terminally ‘unresolved’ phylogeny onto the MPD, MNND or FI values derived using a fully resolved phylogeny. The size of the phylogeny is represented by *N* and the percentage of nodes that were ‘unresolved’ is indicated by Rx. Slopes less than one show a bias towards under-predicting the phylogenetic diversity in an assemblage and vice versa for slopes greater than one.

|  |  | **T20** | | **T25** | | **T30** | | **T35** | |
| --- | --- | --- | --- | --- | --- | --- | --- | --- | --- |
|  | N | ***m*** | ***r2*** | ***m*** | ***r2*** | ***m*** | ***r2*** | ***m*** | ***r2*** |
| MPD | 20 | 1.000 | 0.999 | 0.998 | 0.999 | 0.997 | 0.998 | 0.991 | 0.998 |
| 40 | 1.000 | 0.999 | 0.998 | 0.999 | 1.001 | 0.999 | 1.001 | 0.998 |
| 80 | 1.000 | 0.999 | 0.997 | 0.999 | 1.001 | 0.999 | 1.000 | 0.997 |
| 160 | 1.000 | 0.999 | 0.999 | 0.999 | 1.002 | 0.998 | 1.002 | 0.996 |
| 320 | 1.000 | 0.998 | 0.998 | 0.997 | 1.001 | 0.996 | 1.002 | 0.995 |
| **MNND** | 20 | 1.002 | 0.999 | 1.003 | 0.998 | 1.004 | 0.997 | 1.005 | 0.994 |
| 40 | 1.004 | 0.999 | 1.004 | 0.998 | 1.004 | 0.997 | 1.006 | 0.993 |
| 80 | 1.004 | 0.999 | 1.008 | 0.999 | 1.012 | 0.997 | 1.019 | 0.993 |
| 160 | 1.004 | 0.998 | 1.006 | 0.999 | 1.011 | 0.998 | 1.017 | 0.991 |
| 320 | 1.008 | 0.998 | 1.009 | 0.995 | 1.014 | 0.994 | 1.019 | 0.992 |
| **FI** | 20 | 0.998 | 0.999 | 0.995 | 0.998 | 0.983 | 0.998 | 0.954 | 0.995 |
| 40 | 0.993 | 0.999 | 0.988 | 0.999 | 0.981 | 0.998 | 0.956 | 0.995 |
| 80 | 0.986 | 0.999 | 0.980 | 0.999 | 0.976 | 0.998 | 0.955 | 0.996 |
| 160 | 0.974 | 0.999 | 0.973 | 0.999 | 0.963 | 0.998 | 0.951 | 0.992 |
| 320 | 0.970 | 0.999 | 0.970 | 0.998 | 0.962 | 0.996 | 0.932 | 0.991 |
